# Supplementary material
Source: PubMed Central journal article supplement (PMC4380646)
Supplement: NIHMS645386-supplement-01.pdf [file NIHMS645386-supplement-01.pdf]

Table S1. Variables by quartiles of ratio of evening/morning energy intake, United States and United Kingdom INTERMAP participants, n=2385 <sup>a</sup>

| Variable                             | Ratio of evening/morning energy intake |                     |              |             |              |             |       |             | <i>P</i> for trend |
|--------------------------------------|----------------------------------------|---------------------|--------------|-------------|--------------|-------------|-------|-------------|--------------------|
|                                      | <1.0                                   |                     | ≥1.0 to <1.5 |             | ≥1.5 to <2.0 |             | ≥2.0  |             |                    |
|                                      | mean                                   | 95% CI <sup>b</sup> | mean         | 95% CI      | mean         | 95% CI      | mean  | 95% CI      |                    |
| <i>n</i>                             | 594                                    |                     | 595          |             | 595          |             | 595   |             |                    |
| Men (%)                              | 47                                     |                     | 51           |             | 49           |             | 59    |             |                    |
| Body mass index (kg/m <sup>2</sup> ) | 27.5                                   | 27.1-27.9           | 27.9         | 27.5-28.4   | 28.1         | 27.7-28.6   | 28.7  | 28.3-29.2   | 0.08               |
| Dietary energy density (kcal/g)      | 1.7                                    | 1.7-1.8             | 1.8          | 1.8-1.9     | 1.8          | 1.8-1.9     | 1.9   | 1.9-2.0     | 0.02               |
| Nutrient Rich Food index 9.3         | 31.6                                   | 30.5-32.5           | 31.6         | 30.6-32.6   | 31.5         | 30.5-32.6   | 28.5  | 27.4-29.5   | <0.0001            |
| Total energy (kcal/24 h)             | 2,199                                  | 2,165-2,250         | 2,325        | 2,288-2,373 | 2,332        | 2,292-2,370 | 2,360 | 2,310-2,399 | 0.04               |
| Alcohol (g/24 h)                     | 7.0                                    | 5.8-8.2             | 8.1          | 6.9-9.3     | 8.8          | 7.7-10.0    | 11.0  | 10.0-12.1   | <0.0001            |

<sup>a</sup> Adjusted for gender, age, educational level, hours engaged in moderate and heavy physical activity, smoking, on a special diet, dietary supplement use, (total energy intake, kcal/24 h) and population sample.

<sup>b</sup> 95% CI indicates 95 % confidence interval.

A Bonferroni threshold of *P* <0.01 denoted statistical significance.

Table S2. Estimated mean body mass index differences per 2 standard deviations higher differences of eating occasions, ratio of evening/morning energy intake, dietary energy density, and Nutrient Rich Food index score 9.3 in sub-cohorts, United States and United Kingdom INTERMAP participants

| Variable                                                                          | Number of participants | Body mass index               |                     |          |
|-----------------------------------------------------------------------------------|------------------------|-------------------------------|---------------------|----------|
|                                                                                   |                        | Difference, kg/m <sup>2</sup> | 95% CI <sup>a</sup> | <i>P</i> |
| <b>Excluding participants on weight loss diet<sup>b</sup></b>                     | 2,243                  |                               |                     |          |
| Eating occasions per 24 h <sup>c,d</sup> (2 standard deviations=2.6)              |                        | -1.2                          | -1.6 to -0.7        | <0.0001  |
| Ratio of evening/morning energy intake <sup>c,d</sup> (2 standard deviations=3.6) |                        | 0.04                          | 0.01 to 0.1         | 0.07     |
| Dietary energy density (kcal/g) <sup>c</sup> (2 standard deviations=0.8)          |                        | 1.9                           | 1.4 to 2.4          | <0.0001  |
| Nutrient Rich Food index 9.3 <sup>c,d</sup> (2 standard deviations=28.2)          |                        | -1.6                          | -2.0 to -1.1        | <0.0001  |
| <b>Excluding participants with DM/CVD<sup>e</sup></b>                             | 2,054                  |                               |                     |          |
| Eating occasions per 24 h <sup>c,d</sup> (2 standard deviations=2.6)              |                        | -0.8                          | -1.3 to -0.4        | 0.0008   |

|                                                                                   |      |              |         |
|-----------------------------------------------------------------------------------|------|--------------|---------|
| Ratio of evening/morning energy intake <sup>c,d</sup> (2 standard deviations=3.6) | 0.04 | -0.03 to 0.1 | 0.8     |
| Dietary energy density (kcal/g) <sup>c</sup> (2 standard deviations=0.8)          | 1.8  | 1.4 to 2.3   | <0.0001 |
| Nutrient Rich Food index 9.3 <sup>c,d</sup> (2 standard deviations=28.2)          | -1.4 | -1.8 to -0.9 | <0.0001 |

---

<sup>a</sup> 95% CI indicates 95 % confidence interval.

<sup>b</sup> Participants reporting following a weight-loss diet were excluded.

<sup>c</sup> Adjusted for gender, age, and population sample.

<sup>d</sup> Additionally adjusted for total energy intake (kcal/24 h).

<sup>e</sup> Participants diagnosed with diabetes mellitus or cardiovascular diseases were excluded.

9.3 index in sub-cohorts
